# Supplementary material
Source: publisher figshare collection journal article supplement (https://geolsoc.figshare.com/ndownloader/files/5421464)
Supplement: Supplementary file 1 [file 5421464]

Errors are 1s unless otherwise specified,,,,,,,,,,,,,,,,,,,,,,,,,,,,,,,,,,,,,,,,,,,,,,,,,,,----------------- 204 corrected -----------------,,,,,,,,,,,,,,,,,,
Spot Name,Date/Time,Hours,"Bkrd
cts
/sec","total
204
cts
/sec","total
206
cts
/sec","204
/206","%
err","207
/206","%
err","208
/206","%
err","238
/196","%
err","206
/238","%
err","254
/238","%
err","248
/254","%
err","206Pb
/238U
calibr.
const","%
err","%
com
206","208Pb*
/206Pb*","%
err","ppm
U","ppm
Th","ppm
Rad
206","232Th
/238U","%
err","total
206Pb
/238U","%
err","total
208Pb
/232Th","%
err","204corr
206Pb
/238U
Age","1s
err","207corr
206Pb
/238U
Age","1s
err","208corr
206Pb
/238U
Age","1s
err","204corr
207Pb
/206Pb
Age","1s
err","204corr
208Pb
/232Th
Age","1s
err","%
Dis-
cor-
dant","4corr
208*
/232","%
err","total
238
/206","%
err","total
207
/206","%
err","4corr
238/
206*","%
err","4corr
207*
/206*","%
err","4corr
207*
/235","%
err","4corr
206*
/238","%
err","err
corr","4corr
207*
/235","2 sig 
 abs err","4corr
206*
/238","2 sig 
 abs err","err
corr",Age ,error (2 Sig),MSWD,Prob  conc,Notes
a266-9,"2009-08-15, 18:44",4,0.10,0.10,218,6.9E-5,81,0.070,2.9,0.195,2.3,0.065,1.01,0.34,1.07,5.49,0.90,0.63,0.64,0.0112,1.06,0.123,0.193,2.3,58,37,9,0.66,0.41,0.176,2.0,0.052,3.1,1043,20,1050,21,1047,4,884,66,1007,32,-20,0.051,3.3,5.7,2.0,0.070,2.9,5.7,2.0,0.069,3.2,1.66,3.8,0.176,2.0,0.5,1.66,0.126,0.176,0.0071,0.5,1027.3,36.9,5.61,0.02,core
a266-22,"2009-08-15, 23:25",9,0.12,0.10,704,-6.5E-5,75,0.069,1.2,0.128,1.5,0.206,0.62,0.32,0.58,5.58,0.90,0.41,0.38,0.0103,0.78,-0.117,0.130,1.5,179,75,25,0.43,0.27,0.163,1.9,0.048,2.4,975,17,978,18,975,2,915,32,974,27,-7,0.049,2.8,6.1,1.9,0.069,1.2,6.1,1.9,0.070,1.5,1.57,2.4,0.163,1.9,0.8,1.57,0.077,0.163,0.0062,0.8,960.7,29.8,2.82,0.09,
a266-12,"2009-08-15, 19:54",6,0.00,0.08,226,1.7E-4,65,0.074,2.0,0.266,1.9,0.059,0.99,0.35,1.06,5.58,0.90,0.81,0.60,0.0111,1.06,0.299,0.261,1.9,52,43,8,0.87,0.49,0.175,2.0,0.054,2.8,1037,20,1040,20,1037,4,967,62,1032,33,-8,0.052,3.2,5.7,2.0,0.074,2.0,5.7,2.0,0.071,3.0,1.72,3.6,0.174,2.0,0.6,1.72,0.125,0.174,0.0071,0.6,1029.8,36.9,1.18,0.28,core
a266-52,"2009-08-16, 11:36",21,0.10,0.10,1063,6.3E-5,132,0.073,0.9,0.098,1.4,0.252,0.56,0.37,0.50,5.87,0.42,0.31,0.35,0.0107,0.50,0.112,0.096,1.4,212,67,31,0.33,0.27,0.169,1.8,0.051,2.3,1005,17,1006,18,1006,2,976,39,976,38,-3,0.049,4.0,5.9,1.8,0.073,0.9,5.9,1.8,0.072,1.9,1.67,2.6,0.169,1.8,0.7,1.67,0.088,0.169,0.0061,0.7,1000.3,30.7,0.46,0.50,
a266-14,"2009-08-15, 20:29",6,0.10,0.08,407,-3.7E-5,269,0.071,1.5,0.235,2.1,0.110,0.77,0.34,0.78,5.76,0.66,0.72,0.45,0.0102,0.78,-0.066,0.236,2.1,94,70,13,0.77,0.27,0.161,1.9,0.049,2.8,962,17,961,18,960,4,984,51,977,31,+2,0.049,3.2,6.2,1.9,0.071,1.5,6.2,1.9,0.072,2.5,1.60,3.1,0.161,1.9,0.6,1.60,0.100,0.161,0.0061,0.6,963.8,32.4,0.18,0.67,
a266-3,"2009-08-15, 16:05",2,0.00,0.08,720,5.7E-5,28,0.073,1.1,0.110,1.6,0.192,0.63,0.35,0.59,5.64,0.50,0.35,0.41,0.0109,0.59,0.102,0.108,1.6,166,60,25,0.37,0.30,0.173,1.8,0.051,2.5,1025,17,1026,18,1027,2,994,24,988,24,-3,0.050,2.5,5.8,1.8,0.073,1.1,5.8,1.8,0.072,1.2,1.72,2.2,0.172,1.8,0.8,1.72,0.075,0.172,0.0063,0.8,1014.3,28.0,1.09,0.30,
a266-7,"2009-08-15, 18:09",4,0.10,0.10,720,3.8E-5,80,0.073,1.1,0.191,1.2,0.183,0.65,0.38,1.34,5.75,0.52,0.63,0.36,0.0113,0.61,0.067,0.190,1.2,157,102,24,0.67,0.23,0.178,1.8,0.051,2.2,1055,18,1057,19,1061,3,996,26,994,22,-6,0.050,2.3,5.6,1.8,0.073,1.1,5.6,1.8,0.072,1.3,1.77,2.2,0.178,1.8,0.8,1.77,0.080,0.178,0.0065,0.8,1035.4,29.2,3.45,0.06,
a266-13,"2009-08-15, 20:12",6,0.10,0.09,655,-2.4E-5,87,0.073,1.2,0.194,1.3,0.162,0.67,0.38,0.64,5.80,0.55,0.62,0.38,0.0112,0.65,-0.044,0.195,1.3,138,89,21,0.67,0.33,0.177,1.8,0.052,2.3,1048,18,1049,19,1051,3,1023,25,1021,23,-3,0.052,2.3,5.7,1.8,0.073,1.2,5.7,1.8,0.073,1.3,1.78,2.2,0.177,1.8,0.8,1.78,0.080,0.177,0.0065,0.8,1039.7,29.1,0.68,0.41,
a266-24,"2009-08-16, 00:36",10,0.08,0.10,698,2.8E-5,245,0.074,1.1,0.204,1.2,0.173,0.65,0.37,0.61,5.67,0.52,0.65,0.37,0.0114,0.62,0.050,0.203,1.2,150,100,23,0.69,0.23,0.180,1.8,0.053,2.2,1066,18,1067,19,1069,3,1041,35,1039,26,-3,0.053,2.6,5.6,1.8,0.074,1.1,5.6,1.8,0.074,1.8,1.83,2.5,0.180,1.8,0.7,1.83,0.093,0.180,0.0066,0.7,1060.5,32.1,0.40,0.53,
a266-2,"2009-08-15, 15:48",1,0.10,0.00,1466,-1.7E-5,302,0.074,0.8,0.118,1.1,0.358,0.52,0.38,0.43,5.75,0.37,0.39,0.29,0.0115,0.43,-0.030,0.119,1.1,306,122,48,0.41,0.21,0.182,1.8,0.052,2.1,1078,18,1079,19,1080,2,1043,26,1031,27,-4,0.052,2.7,5.5,1.8,0.074,0.8,5.5,1.8,0.074,1.3,1.86,2.2,0.182,1.8,0.8,1.86,0.081,0.182,0.0065,0.8,1066.2,28.9,1.25,0.26,
a266-50,"2009-08-16, 10:43",20,0.10,0.16,518,1.3E-4,66,0.076,1.3,0.003,11.4,0.139,0.69,0.33,0.69,5.32,0.58,0.01,2.85,0.0114,0.67,0.226,-0.002,11.4,125,1,19,0.01,2.83,0.180,1.9,0.106,11.9,1066,18,1066,19,1067,2,1050,42,-1046,-2192.63,-2,-0.050,204.2,5.6,1.9,0.076,1.3,5.6,1.9,0.074,2.1,1.84,2.8,0.180,1.9,0.7,1.84,0.103,0.180,0.0067,0.7,1063.0,33.5,0.12,0.73,
a266-26,"2009-08-16, 01:28",11,0.00,0.10,299,1.3E-4,28,0.076,1.7,0.191,1.9,0.071,0.93,0.40,0.96,5.56,0.84,0.61,0.60,0.0130,0.99,0.238,0.186,1.9,62,39,11,0.65,0.38,0.205,2.0,0.060,2.8,1197,22,1205,23,1202,4,1056,38,1148,32,-15,0.058,2.9,4.9,2.0,0.076,1.7,4.9,2.0,0.075,1.9,2.10,2.8,0.204,2.0,0.7,2.10,0.116,0.204,0.0081,0.7,1159.3,36.9,10.14,0.00,
a266-49,"2009-08-16, 10:26",20,0.10,0.10,1173,-4.5E-5,39,0.074,0.9,0.090,1.4,0.254,0.77,0.43,0.67,6.07,0.43,0.29,0.35,0.0112,0.59,-0.079,0.092,1.4,209,63,32,0.31,0.27,0.177,1.8,0.051,2.3,1049,18,1049,19,1050,2,1063,19,1031,24,+1,0.052,2.4,5.7,1.8,0.074,0.9,5.7,1.8,0.075,0.9,1.82,2.1,0.177,1.8,0.9,1.82,0.075,0.177,0.0065,0.9,1055.9,25.8,0.29,0.59,
a266-55,"2009-08-16, 12:29",22,0.10,0.00,716,-7.5E-5,62,0.074,1.1,0.101,1.7,0.173,0.65,0.38,0.61,5.67,0.52,0.32,0.43,0.0116,0.62,-0.134,0.104,1.7,149,49,23,0.34,0.33,0.183,1.8,0.055,2.5,1085,18,1086,19,1084,2,1066,29,1108,33,-2,0.056,3.0,5.5,1.8,0.074,1.1,5.5,1.8,0.075,1.4,1.89,2.3,0.183,1.8,0.8,1.89,0.088,0.183,0.0067,0.8,1079.4,30.8,0.31,0.58,
a266-8,"2009-08-15, 18:26",4,0.10,0.10,647,-3.5E-5,60,0.075,1.2,0.396,1.0,0.165,0.66,0.36,0.63,5.70,0.54,1.24,0.34,0.0111,1.27,-0.063,0.397,1.0,142,181,21,1.32,0.18,0.174,2.1,0.052,2.4,1036,21,1034,21,1036,6,1071,25,1035,24,+4,0.053,2.4,5.7,2.1,0.075,1.2,5.7,2.1,0.075,1.2,1.80,2.5,0.174,2.1,0.9,1.80,0.090,0.174,0.0075,0.9,1049.9,32.0,1.18,0.28,rim 
a266-6,"2009-08-15, 17:51",4,0.14,0.09,1118,-2.6E-5,327,0.075,0.9,0.212,1.0,0.293,0.57,0.37,0.49,5.64,0.42,0.69,0.29,0.0116,0.49,-0.046,0.213,1.0,255,181,40,0.73,0.18,0.183,1.8,0.053,2.0,1086,18,1086,19,1090,3,1072,37,1048,26,-1,0.053,2.5,5.5,1.8,0.075,0.9,5.5,1.8,0.075,1.8,1.90,2.6,0.183,1.8,0.7,1.90,0.098,0.183,0.0066,0.7,1082.9,32.3,0.11,0.73,
a266-25,"2009-08-16, 00:53",11,0.10,0.16,393,1.3E-4,46,0.077,1.5,0.109,2.2,0.084,0.85,0.42,0.85,5.73,0.74,0.36,0.92,0.0126,0.88,0.235,0.105,2.2,72,27,12,0.38,0.43,0.198,1.9,0.056,3.0,1164,21,1169,22,1170,3,1078,39,1062,38,-9,0.054,3.7,5.0,1.9,0.077,1.5,5.1,1.9,0.075,1.9,2.06,2.7,0.198,1.9,0.7,2.06,0.113,0.198,0.0077,0.7,1143.8,35.9,3.86,0.05,
a266-39,"2009-08-16, 06:55",17,0.09,0.10,388,-1.1E-4,83,0.075,1.5,0.261,1.5,0.100,0.76,0.32,0.79,5.23,0.66,0.83,0.62,0.0116,2.29,-0.194,0.265,1.5,90,76,14,0.87,0.37,0.184,2.9,0.055,3.3,1089,29,1087,30,1087,5,1115,45,1100,37,+3,0.056,3.5,5.4,2.9,0.075,1.5,5.4,2.9,0.077,2.2,1.95,3.7,0.184,2.9,0.8,1.95,0.142,0.184,0.0106,0.8,1096.1,48.8,0.24,0.62,
a266-11,"2009-08-15, 19:37",5,0.00,0.12,635,4.7E-5,100,0.078,1.2,0.093,1.9,0.166,0.66,0.36,0.63,5.58,0.54,0.26,0.48,0.0114,1.31,0.084,0.092,1.9,144,39,22,0.28,0.37,0.179,2.2,0.060,2.9,1063,21,1060,22,1059,2,1118,29,1159,39,+5,0.059,3.5,5.6,2.2,0.078,1.2,5.6,2.2,0.077,1.5,1.90,2.6,0.179,2.2,0.8,1.90,0.100,0.179,0.0078,0.8,1081.3,34.9,2.30,0.13,rim 
a266-31,"2009-08-16, 03:14",13,0.16,0.12,240,-1.9E-4,159,0.075,2.0,0.240,2.0,0.060,0.99,0.37,1.04,5.63,0.89,0.76,0.60,0.0114,1.05,-0.342,0.246,2.0,52,41,8,0.81,0.37,0.180,2.0,0.053,2.8,1070,21,1067,21,1068,4,1132,117,1081,57,+6,0.055,5.4,5.6,2.0,0.075,2.0,5.5,2.1,0.077,5.9,1.93,6.3,0.181,2.1,0.3,1.93,0.241,0.181,0.0076,0.3,1071.5,40.8,0.26,0.61,
a266-18,"2009-08-15, 21:57",8,0.10,0.14,161,-2.9E-4,63,0.074,2.4,0.252,2.3,0.039,1.19,0.38,1.28,5.66,1.11,0.79,0.75,0.0117,1.31,-0.518,0.261,2.3,33,27,5,0.84,0.45,0.185,2.2,0.055,3.2,1101,22,1098,23,1096,5,1151,80,1137,46,+5,0.058,4.2,5.4,2.2,0.074,2.4,5.4,2.2,0.078,4.0,2.01,4.6,0.186,2.2,0.5,2.01,0.184,0.186,0.0082,0.5,1103.9,42.9,0.36,0.55,
a266-51,"2009-08-16, 11:19",21,0.10,0.00,203,-2.0E-4,29,0.076,2.1,0.247,2.1,0.050,1.08,0.38,1.15,5.93,0.98,0.75,0.65,0.0107,1.16,-0.364,0.253,2.1,42,33,6,0.80,0.40,0.169,2.1,0.052,3.0,1008,19,1000,20,1003,4,1176,45,1050,32,+15,0.053,3.1,5.9,2.1,0.076,2.1,5.9,2.1,0.079,2.3,1.85,3.1,0.169,2.1,0.7,1.85,0.114,0.169,0.0071,0.7,1028.7,36.8,11.27,0.00,
a266-10,"2009-08-15, 19:01",5,0.14,0.00,220,-5.4E-4,68,0.077,2.0,0.238,2.1,0.055,1.05,0.39,1.11,5.85,1.12,0.78,0.88,0.0116,1.54,-0.954,0.255,2.1,47,37,7,0.83,0.53,0.183,2.3,0.053,3.1,1095,24,1084,24,1091,4,1295,122,1125,67,+17,0.057,6.1,5.5,2.3,0.077,2.0,5.4,2.4,0.084,6.3,2.15,6.7,0.185,2.4,0.4,2.15,0.289,0.185,0.0089,0.4,1100.0,47.9,2.33,0.13,
a266-41,"2009-08-16, 07:30",17,0.10,0.10,863,4.8E-5,50,0.085,1.0,0.134,1.3,0.157,0.67,0.50,0.60,5.82,0.55,0.43,0.41,0.0147,0.65,0.085,0.132,1.3,133,59,26,0.46,0.29,0.231,1.8,0.068,2.3,1341,22,1343,24,1343,4,1310,20,1308,30,-3,0.067,2.4,4.3,1.8,0.085,1.0,4.3,1.8,0.085,1.1,2.70,2.1,0.231,1.8,0.9,2.70,0.115,0.231,0.0086,0.9,1324.1,30.1,1.04,0.31,
a266-23,"2009-08-16, 00:18",10,0.00,0.00,381,2.1E-4,22,0.089,1.4,0.263,1.5,0.076,0.92,0.49,0.90,5.46,0.82,0.85,0.55,0.0162,0.96,0.382,0.256,1.5,68,58,15,0.89,0.32,0.256,2.0,0.075,2.5,1464,26,1475,29,1469,6,1334,33,1423,36,-11,0.073,2.6,3.9,2.0,0.089,1.4,3.9,2.0,0.086,1.7,3.02,2.6,0.255,2.0,0.8,3.02,0.157,0.255,0.0101,0.8,1411.4,39.7,9.56,0.00,
a266-19,"2009-08-15, 22:15",8,0.12,0.13,1879,1.2E-5,496,0.087,0.7,0.140,0.9,0.333,0.53,0.52,0.41,5.88,0.38,0.46,0.28,0.0150,0.61,0.021,0.140,0.9,281,134,57,0.49,0.19,0.237,1.8,0.068,2.0,1370,23,1372,24,1374,4,1347,22,1318,33,-2,0.067,2.6,4.2,1.8,0.087,0.7,4.2,1.8,0.086,1.2,2.82,2.2,0.237,1.8,0.8,2.82,0.123,0.237,0.0087,0.8,1358.8,31.9,0.52,0.47,
a266-1,"2009-08-15, 15:30",1,0.10,0.10,241,6.3E-5,81,0.088,1.8,0.195,2.1,0.048,1.09,0.46,1.11,5.56,0.99,0.63,0.70,0.0147,1.17,0.112,0.193,2.1,42,27,8,0.67,0.45,0.232,2.1,0.068,3.0,1342,25,1341,27,1345,5,1357,39,1309,40,+1,0.067,3.2,4.3,2.1,0.088,1.8,4.3,2.1,0.087,2.0,2.77,2.9,0.231,2.1,0.7,2.77,0.161,0.231,0.0097,0.7,1346.5,42.6,0.10,0.75,
a266-29,"2009-08-16, 02:21",12,0.12,0.18,502,1.6E-4,52,0.091,1.2,0.192,1.5,0.082,0.82,0.51,0.80,5.68,0.72,0.63,0.51,0.0160,1.17,0.289,0.186,1.5,70,46,15,0.67,0.32,0.252,2.1,0.072,2.6,1444,27,1449,29,1452,5,1394,35,1362,41,-4,0.070,3.1,4.0,2.1,0.091,1.2,4.0,2.1,0.089,1.8,3.07,2.8,0.251,2.1,0.8,3.07,0.171,0.251,0.0105,0.8,1425.4,42.6,1.26,0.26,
a266-48,"2009-08-16, 10:08",20,0.10,0.00,484,1.5E-5,1975,0.089,1.3,0.189,1.5,0.081,0.83,0.51,0.81,5.83,0.73,0.61,1.14,0.0148,0.87,0.026,0.188,1.5,69,44,14,0.66,0.86,0.233,1.9,0.067,2.6,1352,24,1348,25,1356,4,1407,91,1309,81,+4,0.067,6.4,4.3,1.9,0.089,1.3,4.3,2.0,0.089,4.7,2.87,5.1,0.233,2.0,0.4,2.87,0.295,0.233,0.0094,0.4,1355.4,47.5,0.34,0.56,
a266-44,"2009-08-16, 08:40",18,0.18,0.08,610,-1.3E-4,85,0.094,1.1,0.119,1.7,0.102,0.76,0.51,0.73,5.51,0.66,0.39,0.52,0.0167,0.78,-0.229,0.124,1.7,90,35,20,0.41,0.38,0.263,1.9,0.077,2.6,1506,26,1503,28,1503,4,1542,36,1558,63,+3,0.080,4.2,3.8,1.9,0.094,1.1,3.8,1.9,0.096,1.9,3.47,2.7,0.263,1.9,0.7,3.47,0.188,0.263,0.0100,0.7,1517.8,42.1,0.66,0.41,
a266-28,"2009-08-16, 02:03",12,0.00,0.10,910,5.4E-5,39,0.098,0.9,0.063,2.6,0.135,0.69,0.59,0.63,5.68,0.58,0.21,0.54,0.0182,1.34,0.097,0.061,2.6,116,25,29,0.23,0.44,0.287,2.2,0.080,3.4,1627,32,1633,35,1631,5,1576,18,1515,53,-4,0.078,3.7,3.5,2.2,0.098,0.9,3.5,2.2,0.097,0.9,3.86,2.4,0.287,2.2,0.9,3.86,0.184,0.287,0.0126,0.9,1588.1,31.0,2.01,0.16,
a266-17,"2009-08-15, 21:40",7,0.10,0.16,1125,5.2E-5,76,0.099,0.8,0.097,1.4,0.173,0.66,0.61,0.57,5.87,0.53,0.32,0.43,0.0176,0.63,0.093,0.095,1.4,146,48,35,0.34,0.33,0.277,1.8,0.079,2.3,1575,26,1574,28,1578,4,1591,18,1507,41,+1,0.077,2.8,3.6,1.8,0.099,0.8,3.6,1.8,0.098,1.0,3.75,2.1,0.277,1.8,0.9,3.75,0.156,0.277,0.0102,0.9,1585.9,29.7,0.25,0.62,
a266-43,"2009-08-16, 08:23",18,0.10,0.10,1409,1.1E-4,29,0.106,0.9,0.175,0.9,0.190,0.62,0.66,0.52,5.74,0.49,0.58,0.35,0.0200,0.79,0.201,0.171,0.9,163,98,44,0.62,0.23,0.315,1.9,0.089,2.1,1760,29,1768,33,1767,6,1698,19,1676,36,-4,0.086,2.2,3.2,1.9,0.106,0.9,3.2,1.9,0.104,1.0,4.51,2.2,0.314,1.9,0.9,4.51,0.196,0.314,0.0120,0.9,1717.2,32.4,3.01,0.08,
a266-16,"2009-08-15, 21:22",7,0.10,0.10,1372,1.9E-5,280,0.110,0.7,0.401,0.7,0.197,0.62,0.64,0.52,5.59,0.49,1.32,0.37,0.0209,0.79,0.034,0.400,0.7,172,235,48,1.41,0.21,0.329,1.9,0.093,2.0,1833,30,1838,35,1839,10,1795,17,1802,36,-2,0.093,2.1,3.0,1.9,0.110,0.7,3.0,1.9,0.110,0.9,4.97,2.1,0.329,1.9,0.9,4.97,0.212,0.329,0.0125,0.9,1804.1,30.2,1.18,0.28,
a266-45,"2009-08-16, 08:58",19,0.00,0.16,1326,8.6E-5,26,0.113,0.7,0.090,1.3,0.158,0.65,0.73,0.56,5.79,0.53,0.29,0.45,0.0217,0.63,0.153,0.087,1.3,135,41,39,0.31,0.34,0.342,1.8,0.097,2.3,1892,30,1902,35,1895,6,1825,14,1815,43,-4,0.094,2.5,2.9,1.8,0.113,0.7,2.9,1.8,0.112,0.7,5.25,2.0,0.341,1.8,0.9,5.25,0.209,0.341,0.0126,0.9,1836.7,25.2,3.97,0.05,
a266-40,"2009-08-16, 07:13",17,0.08,0.20,290,5.9E-4,49,0.134,1.4,0.246,1.8,0.033,1.26,0.76,1.22,5.43,1.18,0.84,0.80,0.0256,1.38,1.053,0.226,1.8,30,25,10,0.88,0.47,0.404,2.2,0.113,2.9,2169,42,2197,52,2192,11,2048,61,1973,107,-7,0.103,5.7,2.5,2.2,0.134,1.4,2.5,2.3,0.126,3.4,6.97,4.1,0.400,2.3,0.6,6.97,0.575,0.400,0.0182,0.6,2127.5,67.6,2.70,0.10,
a266-42,"2009-08-16, 08:05",18,0.00,1.21,4356,2.7E-4,13,0.152,0.3,0.087,0.7,0.696,0.75,0.51,0.32,5.46,0.34,0.25,0.30,0.0168,0.40,0.472,0.078,0.7,608,154,138,0.26,0.18,0.266,1.8,0.088,1.9,1512,24,1408,24,1511,4,2335,8,1520,37,+39,0.078,2.5,3.8,1.8,0.152,0.3,3.8,1.8,0.149,0.5,5.43,1.8,0.264,1.8,1.0,5.43,0.199,0.264,0.0094,1.0,2293.9,9.9,1274.86,0.00,
a266-32,"2009-08-16, 03:31",13,0.00,0.12,2068,1.4E-5,100,0.152,0.5,0.334,0.8,0.199,0.61,0.94,0.49,5.76,0.49,1.17,0.31,0.0281,0.57,0.026,0.333,0.8,169,204,64,1.24,0.16,0.443,1.8,0.119,2.0,2365,36,2366,48,2382,13,2363,9,2267,43,-0,0.119,2.0,2.3,1.8,0.152,0.5,2.3,1.8,0.151,0.5,9.26,1.9,0.443,1.8,1.0,9.26,0.350,0.443,0.0162,1.0,2363.0,16.7,0.00,0.96,
a266-54,"2009-08-16, 12:11",22,0.12,0.08,1258,-3.0E-5,235,0.168,0.6,0.132,1.1,0.114,0.75,0.98,0.64,5.68,0.64,0.45,0.48,0.0299,0.88,-0.053,0.133,1.1,98,46,40,0.48,0.33,0.472,1.9,0.129,2.3,2493,40,2474,55,2494,11,2542,13,2475,70,+2,0.130,3.0,2.1,1.9,0.168,0.6,2.1,1.9,0.168,0.8,10.96,2.1,0.472,1.9,0.9,10.96,0.461,0.472,0.0184,0.9,2537.0,25.0,1.32,0.25,
a266-4,"2009-08-15, 16:23",2,0.00,0.11,1276,7.7E-5,42,0.173,0.6,0.142,1.1,0.107,0.77,1.08,0.66,5.91,0.66,0.46,0.49,0.0307,0.78,0.138,0.139,1.1,89,43,37,0.50,0.34,0.484,1.9,0.138,2.2,2543,40,2530,57,2541,11,2573,11,2568,57,+1,0.135,2.4,2.1,1.9,0.173,0.6,2.1,1.9,0.172,0.6,11.44,2.0,0.484,1.9,0.9,11.44,0.459,0.484,0.0184,0.9,2571.0,20.5,0.53,0.47,
a266-27,"2009-08-16, 01:46",11,0.10,0.00,453,-1.9E-4,43,0.177,1.0,0.328,1.2,0.038,1.20,1.08,1.11,5.79,1.10,1.18,0.95,0.0314,3.77,-0.345,0.334,1.2,33,40,14,1.26,0.50,0.496,4.1,0.129,4.4,2602,89,2579,128,2618,21,2651,19,2507,105,+2,0.132,4.5,2.0,4.1,0.177,1.0,2.0,4.1,0.180,1.1,12.33,4.3,0.497,4.1,1.0,12.33,1.059,0.497,0.0412,1.0,2649.3,35.7,0.30,0.59,
a266-37,"2009-08-16, 06:20",16,0.00,0.12,1263,5.9E-5,29,0.183,0.6,0.249,0.8,0.102,0.80,1.18,0.69,6.01,0.69,0.88,0.45,0.0327,0.82,0.105,0.247,0.8,85,78,38,0.95,0.31,0.515,1.9,0.135,2.1,2676,42,2676,65,2692,14,2676,10,2542,51,+0,0.134,2.1,1.9,1.9,0.183,0.6,1.9,1.9,0.183,0.6,12.95,2.0,0.514,1.9,1.0,12.95,0.519,0.514,0.0197,1.0,2675.8,19.1,0.00,1.00,
a266-53,"2009-08-16, 11:54",22,0.00,0.10,578,1.2E-4,24,0.185,0.9,0.340,1.1,0.047,1.07,1.07,0.98,5.66,0.98,1.20,0.62,0.0333,1.16,0.215,0.336,1.1,41,50,18,1.27,0.44,0.525,2.1,0.141,2.4,2714,46,2731,74,2729,17,2685,15,2624,59,-1,0.139,2.4,1.9,2.1,0.185,0.9,1.9,2.1,0.183,0.9,13.24,2.3,0.524,2.1,0.9,13.24,0.600,0.524,0.0218,0.9,2687.3,28.1,0.37,0.54,
a266-33,"2009-08-16, 03:49",14,0.10,0.00,1769,-9.3E-6,389,0.184,0.5,0.264,0.7,0.148,0.68,1.10,0.57,5.73,0.57,0.93,0.37,0.0332,0.67,-0.016,0.264,0.7,126,121,57,0.99,0.29,0.523,1.9,0.140,2.0,2711,41,2724,65,2719,14,2688,9,2647,51,-1,0.140,2.1,1.9,1.9,0.184,0.5,1.9,1.9,0.184,0.5,13.25,1.9,0.523,1.9,1.0,13.25,0.513,0.523,0.0194,1.0,2689.1,17.7,0.29,0.59,
a266-35,"2009-08-16, 04:24",14,0.12,0.10,1466,3.6E-5,75,0.184,0.5,0.287,0.7,0.125,0.72,1.02,0.83,5.50,0.83,1.00,0.40,0.0334,0.72,0.064,0.285,0.7,110,113,50,1.06,0.22,0.527,1.9,0.142,2.0,2726,42,2747,68,2733,15,2690,9,2674,51,-2,0.141,2.1,1.9,1.9,0.184,0.5,1.9,1.9,0.184,0.6,13.36,2.0,0.526,1.9,1.0,13.36,0.523,0.526,0.0197,1.0,2691.5,18.5,0.72,0.40,
a266-47,"2009-08-16, 09:51",20,0.00,0.10,1625,2.6E-5,29,0.184,0.5,0.341,0.6,0.130,0.71,1.11,0.59,5.86,0.59,1.20,0.50,0.0321,0.70,0.045,0.341,0.6,110,136,48,1.28,0.27,0.506,1.9,0.135,2.0,2637,40,2610,59,2653,15,2691,8,2548,48,+2,0.134,2.0,2.0,1.9,0.184,0.5,2.0,1.9,0.184,0.5,12.84,1.9,0.506,1.9,1.0,12.84,0.497,0.506,0.0189,1.0,2688.6,16.2,1.68,0.19,
a266-30,"2009-08-16, 02:38",12,0.10,0.10,1723,-1.4E-5,139,0.184,0.5,0.070,1.3,0.140,0.68,1.07,0.57,5.63,0.57,0.24,0.51,0.0334,0.67,-0.026,0.070,1.3,121,30,55,0.25,0.41,0.527,1.9,0.144,2.3,2728,41,2749,67,2728,12,2694,8,2742,65,-2,0.145,2.5,1.9,1.9,0.184,0.5,1.9,1.9,0.185,0.5,13.40,1.9,0.527,1.9,1.0,13.40,0.516,0.527,0.0196,1.0,2695.2,16.8,0.67,0.41,
a266-46,"2009-08-16, 09:33",19,0.00,0.10,1437,2.9E-5,29,0.189,0.5,0.504,0.6,0.108,0.75,1.15,0.64,5.83,0.64,1.77,0.38,0.0336,0.76,0.051,0.504,0.6,91,167,42,1.89,0.18,0.529,1.9,0.141,2.0,2737,42,2741,68,2756,20,2729,9,2666,50,-0,0.141,2.0,1.9,1.9,0.189,0.5,1.9,1.9,0.188,0.5,13.74,2.0,0.529,1.9,1.0,13.74,0.540,0.529,0.0200,1.0,2728.9,17.4,0.03,0.85,
a266-20,"2009-08-15, 22:32",8,0.10,0.10,1368,-6.1E-6,560,0.190,0.5,0.157,1.0,0.103,0.91,1.18,0.66,5.81,0.67,0.56,0.47,0.0346,0.79,-0.011,0.157,1.0,87,50,41,0.60,0.31,0.545,1.9,0.143,2.2,2805,43,2847,76,2812,14,2744,10,2712,59,-3,0.144,2.3,1.8,1.9,0.190,0.5,1.8,1.9,0.190,0.6,14.30,2.0,0.545,1.9,1.0,14.30,0.570,0.545,0.0208,1.0,2747.5,19.4,1.87,0.17,
a266-21,"2009-08-15, 23:07",9,0.00,0.08,2562,2.3E-5,40,0.194,0.4,0.144,0.8,0.204,0.62,1.16,0.48,5.77,0.48,0.50,0.35,0.0347,0.57,0.041,0.143,0.8,174,90,82,0.54,0.24,0.547,1.8,0.147,2.0,2812,42,2836,72,2816,14,2777,7,2748,51,-2,0.146,2.0,1.8,1.8,0.194,0.4,1.8,1.8,0.194,0.4,14.64,1.9,0.547,1.8,1.0,14.64,0.547,0.547,0.0199,1.0,2778.0,13.2,0.69,0.41,
a266-34,"2009-08-16, 04:06",14,0.00,0.20,479,2.0E-4,30,0.197,0.9,0.113,2.0,0.042,1.18,1.10,1.09,5.59,1.10,0.40,0.86,0.0356,1.50,0.362,0.106,2.0,36,15,17,0.42,0.62,0.561,2.3,0.152,3.1,2863,53,2925,102,2872,14,2782,16,2675,95,-4,0.141,3.8,1.8,2.3,0.197,0.9,1.8,2.3,0.195,1.0,15.01,2.5,0.559,2.3,0.9,15.01,0.752,0.559,0.0257,0.9,2789.4,32.2,2.07,0.15,
a266-5,"2009-08-15, 16:41",2,0.14,0.00,1204,-9.8E-5,66,0.206,0.6,0.293,0.8,0.096,0.82,1.19,0.84,5.64,0.72,1.04,0.46,0.0367,0.84,-0.174,0.297,0.8,83,89,42,1.11,0.60,0.578,1.9,0.153,2.2,2946,46,3001,95,2950,18,2887,11,2918,63,-3,0.155,2.3,1.7,1.9,0.206,0.6,1.7,1.9,0.208,0.7,16.59,2.0,0.579,1.9,0.9,16.59,0.678,0.579,0.0224,0.9,2890.4,21.7,1.56,0.21,
a266-38,"2009-08-16, 06:37",16,0.09,0.10,2316,1.3E-5,246,0.212,0.5,0.220,0.7,0.176,0.62,1.13,0.50,5.50,0.69,0.78,0.60,0.0365,0.59,0.024,0.220,0.7,154,123,76,0.83,0.63,0.575,1.8,0.153,2.0,2930,43,2939,83,2935,16,2919,9,2879,57,-0,0.153,2.1,1.7,1.8,0.212,0.5,1.7,1.8,0.212,0.6,16.80,1.9,0.575,1.8,1.0,16.80,0.645,0.575,0.0211,1.0,2919.4,18.4,0.06,0.81,
a266-36,"2009-08-16, 06:02",16,0.10,0.10,1447,-1.6E-5,60,0.222,0.5,0.209,0.8,0.106,1.29,1.21,1.10,5.68,0.66,0.74,0.45,0.0374,0.78,-0.028,0.209,0.8,91,69,46,0.78,0.37,0.589,1.9,0.157,2.1,2987,45,2976,90,2989,16,2997,8,2963,58,+0,0.158,2.1,1.7,1.9,0.222,0.5,1.7,1.9,0.222,0.5,18.05,2.0,0.589,1.9,1.0,18.05,0.709,0.589,0.0224,1.0,2996.2,15.9,0.05,0.83,
a266-15,"2009-08-15, 20:47",6,0.17,0.00,427,-4.0E-4,33,0.249,0.9,0.150,1.8,0.028,1.64,1.38,1.28,5.90,1.29,0.54,0.92,0.0404,2.08,-0.706,0.164,1.8,24,13,13,0.58,0.98,0.637,2.7,0.165,3.4,3194,69,3168,181,3182,18,3208,16,3371,141,+1,0.182,4.5,1.6,2.7,0.249,0.9,1.6,2.7,0.254,1.0,22.44,2.9,0.641,2.7,0.9,22.44,1.306,0.641,0.0349,0.9,3207.7,31.8,0.04,0.84,
